# Supplementary material for: Copper–Calcium Hydroxide and Permanent Electrophoretic Current for Treatment of Apical Periodontitis
Source: MDPI journal article supplement (doi:10.3390/ma14030678), 2021-02-02
Supplement: s1 [file s1]

Supplementary Materials

# Copper–Calcium Hydroxide and Permanent Electrophoretic Current for Treatment of Apical Periodontitis

Agron Meto <sup>1</sup>, Etleva Droboniku <sup>2</sup>, Elisabetta Blasi <sup>3</sup>, Bruna Colombari <sup>3</sup>, Emiljano Tragaj <sup>1</sup>, Gabriele Cervino <sup>4</sup>, Luca Fiorillo <sup>4,5,\*</sup>, and Aida Meto <sup>2,3,\*</sup>

<sup>1</sup> Department of Therapy, Faculty of Dentistry, University of Aldent, 1000 Tirana, Albania; agronmeto@yahoo.com (A.M.); emiljanotragaj@yahoo.com (E.T.)

<sup>2</sup> Department of Dental Therapy, Faculty of Dental Medicine, University of Medicine, 1005 Tirana, Albania; etleva.droboniku@umed.edu.al

<sup>3</sup> Department of Surgical, Medical, Dental and Morphological Sciences with Interest in Transplant, Oncological and Regenerative Medicine, University of Modena and Reggio Emilia, 41125 Modena, Italy; elisabetta.blasi@unimore.it (E.B.); bruna.colombari@unimore.it (B.C.)

<sup>4</sup> Department of Biomedical and Dental Sciences, Morphological and Functional Images, University of Messina, 98100 Messina, Italy; gcervino@unime.it

<sup>5</sup> Multidisciplinary Department of Medical-Surgical and Odontostomatological Specialties, University of Campania “Luigi Vanvitelli”, 80121 Naples, Italy

\* Correspondence: lfiorillo@unime.it (L.F.); aidameto@yahoo.com (A.M.); Tel.: +35-569-331-7677 (A.M. & L.F.)

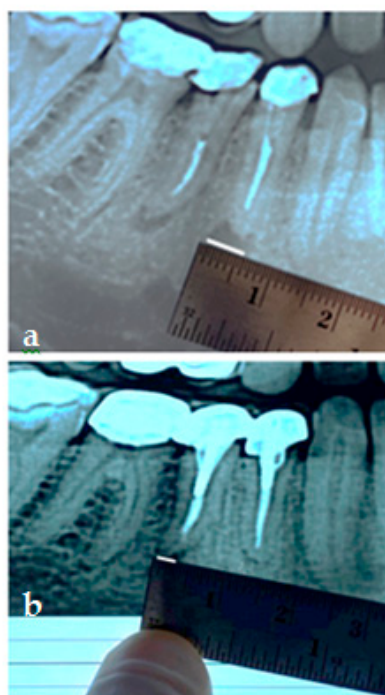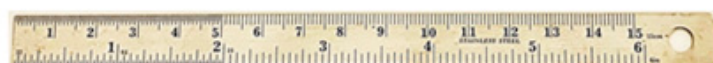

**Publisher’s Note:** MDPI stays neutral with regard to jurisdictional claims in published maps and institutional affiliations.

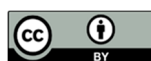

**Copyright:** © 2021 by the authors. Licensee MDPI, Basel, Switzerland. This article is an open access article distributed under the terms and conditions of the Creative Commons Attribution (CC BY) license (<http://creativecommons.org/licenses/by/4.0/>).

**Figure S1.** An example of how focal size measurement was made using the ruler, before (a) and after (b) treatment in follow-up.
